# Supplementary material
Source: Royal Society of Chemistry journal article supplement (doi:10.1039/d5ta07865b)
Supplement: d5ta07865b1.pdf [file d5ta07865b1.pdf]

## Supporting Information

### **New insights into ultra-deep oxidative desulfurization in the presence of competing molecules over alumina-supported vanadium-promoted tungsten oxide catalyst**

Elnaz Askari<sup>a</sup>, Amin Bazayari<sup>a,\*</sup>, Hadi Alinejad<sup>b</sup>, Javad Beheshtian<sup>c</sup>, Seyed Mehdi Alavi<sup>a</sup>, Levi T. Thompson<sup>d,\*</sup>

<sup>a</sup>*Catalysis and Nanomaterials Research Laboratory, School of Chemical, Petroleum, and Gas Engineering, Iran University of Science and Technology, P.O. Box 16765-163, Tehran, Iran*

<sup>b</sup>*Department of Chemistry, Tarbiat Modares University, Tehran, Iran*

<sup>c</sup>*Department of Chemistry, Faculty of Sciences, Shahid Rajaee Teacher Training University, P.O. Box 16785-163, Tehran, Iran*

<sup>d</sup>*Department of Chemical and Biomolecular Engineering, University of Delaware, Newark, DE, 19717 USA*

\*Corresponding author. Tel./Fax: +98 21 7322 8755/ +98 21 7724 0496.

E-mail addresses: [abazayari@iust.ac.ir](mailto:abazayari@iust.ac.ir) (A. Bazayari), [ltt@udel.edu](mailto:ltt@udel.edu) (L.T. Thompson).

**Fig. S1.** Comparison of the catalytic performance of mono-metallic catalysts (3V/Al and 17W/Al) and the bimetallic catalyst (3V17W/Al). Reaction conditions: 3.0 g of model fuel (500 ppmw S in *n*-hexadecane), 0.03 g catalyst, reaction temperature: 353K, and TBHP/DBT molar ratio: 5.0.

S3

**Fig. S2.** Comparison between XRD patterns of fresh and used 3V17W/Al catalyst. S4

**Fig. S3.** Periodic ODS performance of 3V17W/Al catalyst. Reaction conditions: 3.0 g of model fuel (500 ppmw S (2875 ppmw DBT) in *n*-hexadecane), 0.03 g catalyst, reaction temperature: 353K, and TBHP/DBT molar ratio: 5.0. S5

**Table S1.** Comparison between fresh and used 3V17W/Al catalyst on an SO<sub>3</sub>-free oxide basis. S6

**Table S2.** Comparison of the catalytic performance of 3V17W/Al with other tungsten-based catalysts reported in the literature for ODS of DBT. S7

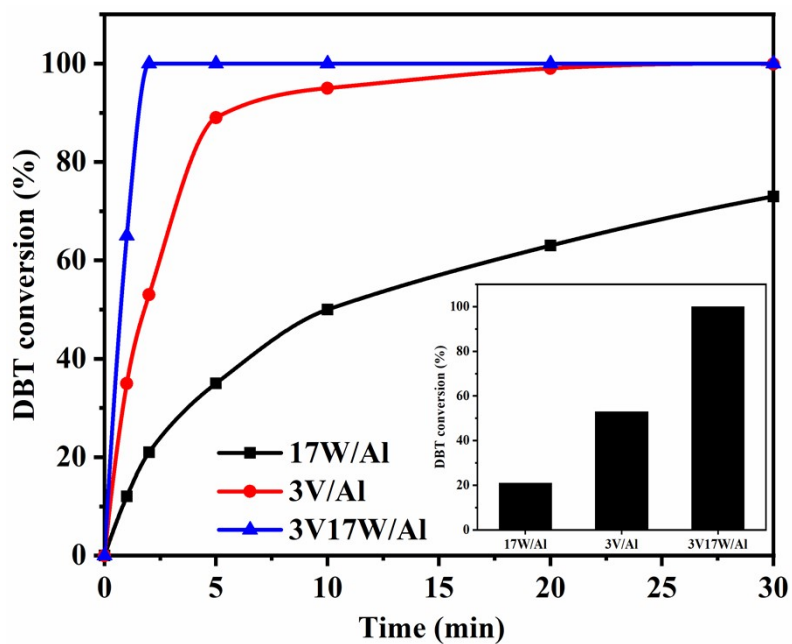

**Fig. S1.** Comparison of the catalytic performance of mono-metallic catalysts (3V/Al and 17W/Al) and the bimetallic catalyst (3V17W/Al). Reaction conditions: 3.0 g of model fuel (500 ppmw S in *n*-hexadecane), 0.03 g catalyst, reaction temperature: 353K, and TBHP/DBT molar ratio: 5.0.

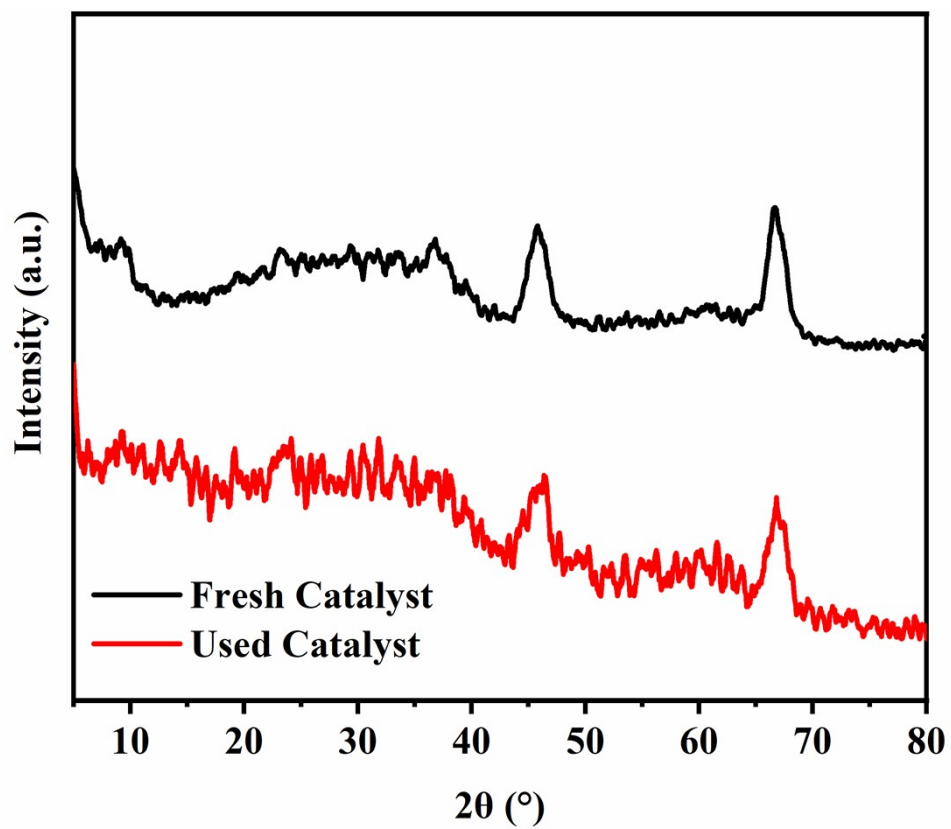

**Fig. S2.** Comparison between XRD patterns of fresh and used 3V17W/Al catalyst.

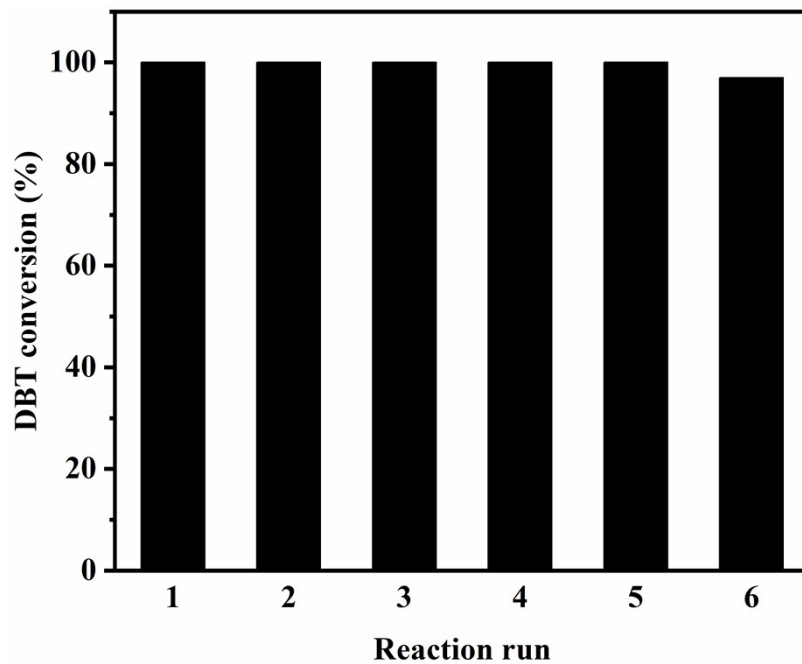

**Fig. S3.** Periodic ODS performance of 3V17W/Al catalyst. Reaction conditions: 3.0 g of model fuel (500 ppmw S (2875 ppmw DBT) in *n*-hexadecane), 0.03 g catalyst, reaction temperature: 353K, and TBHP/DBT molar ratio: 5.0.

**Table S1.** Comparison between fresh and used 3V17W/Al catalyst on an SO<sub>3</sub>-free oxide basis.

| Sample         | W (wt%)<br>SO <sub>3</sub> -free basis | V (wt%)<br>SO <sub>3</sub> -free basis | SO <sub>3</sub> (wt%) |
|----------------|----------------------------------------|----------------------------------------|-----------------------|
| Fresh catalyst | 18.11                                  | 3.49                                   | -                     |
| Used catalyst  | 15.95                                  | 2.65                                   | 2.10                  |

**Table S2.** Comparison of the catalytic performance of 3V17W/Al with other tungsten-based catalysts reported in the literature for ODS of DBT.

| Catalyst                                                  | Oxidant                                 | Sulfur concentration (ppm)              | T (K) | extractor                         | Time (min) | Conversion (%) | Ref.      |
|-----------------------------------------------------------|-----------------------------------------|-----------------------------------------|-------|-----------------------------------|------------|----------------|-----------|
| 3V17W/Al                                                  | TBHP (O/S=5)                            | 500 (DBT)                               | 353   | -                                 | 2          | 100            | This work |
| WO <sub>x</sub> /ZrO <sub>2</sub> (TA-700)                | H <sub>2</sub> O <sub>2</sub> (O/S=20)  | -(DBT)                                  | 333   | γ-butyrolactone                   | 3          | 100            | [1]       |
| W-SiO <sub>2</sub> -20                                    | H <sub>2</sub> O <sub>2</sub> (O/S=2.5) | 500 (DBT)                               | 333   | -                                 | 30         | 100            | [2]       |
| CoW(15)/CNT                                               | H <sub>2</sub> O <sub>2</sub> (O/S=6)   | 500 (DBT)                               | 348   | acetonitrile                      | 40         | 100            | [3]       |
| WO <sub>3</sub> /g-C <sub>3</sub> N <sub>4</sub>          | H <sub>2</sub> O <sub>2</sub> (O/S=3)   | 500 (DBT, 4-MDBT, 4, 6-DMDBT and 3-MBT) | 323   | -                                 | 40         | 100            | [4]       |
| WO <sub>3</sub> /TiO <sub>2</sub>                         | H <sub>2</sub> O <sub>2</sub> (O/S=4)   | 500 (DBT)                               | 323   | acetonitrile                      | 60         | 100            | [5]       |
| WO <sub>x</sub> /ZrO <sub>2</sub> (7 W/nm <sup>2</sup> )  | H <sub>2</sub> O <sub>2</sub> (O/S=0.2) | 9882 (DBT)                              | 333   | acetonitrile                      | 5          | 70             | [6]       |
| N-WO <sub>3</sub> -NH <sub>2</sub> -SiO <sub>2</sub> @SiC | H <sub>2</sub> O <sub>2</sub> (-)       | 500 (DBT)                               | 328   | acetonitrile                      | 160        | 100            | [7]       |
| 35%WO <sub>3</sub> /Al <sub>2</sub> O <sub>3</sub>        | TBHP (O/S=1.5)                          | 55 (DBT in kerosene)                    | 383   | -                                 | 180        | 78.76          | [8]       |
| 1%wt sodium tungstate                                     | TBHP (O/S=32)                           | 140 (hydrotreated diesel fuel)          | 363   | methanol (with 15 min Ultrasound) | 15         | 91             | [9]       |

|                                      |                 |                                                                                       |     |                             |    |     |      |
|--------------------------------------|-----------------|---------------------------------------------------------------------------------------|-----|-----------------------------|----|-----|------|
| -                                    | TBHP<br>(O/S=2) | 500(Model diesel: 50 ppm thiophene, 150 ppm DBT, and 300 ppm 4,6-DMDBT in n-octane.)  | 323 | N,N-dimethylformamide (DMF) | 30 | 100 | [10] |
| Co/Mn/Al <sub>2</sub> O <sub>3</sub> | TBHP<br>(O/S=3) | 600(Model diesel: 200 ppm thiophene, 200 ppm DBT, and 200 ppm 4,6-DMDBT in n-octane.) | 333 | N,N-dimethylformamide (DMF) | 30 | 87  | [11] |
